# Supplementary material for: M1 muscarinic receptor is a key target of neuroprotection, neuroregeneration and memory recovery by i-Extract from Withania somnifera
Source: PubMed Central journal article supplement (PMC6769020; doi:10.1038/s41598-019-48238-6), 2019-09-30

*Withania* extract operates through M1 receptor

**M1 muscarinic receptor is a key target of neuroprotection, neuroregeneration and memory recovery by i-Extract from *Withania somnifera*.**

**Arpita Konar, Richa Gupta, Rajendra K. Shukla, Bryan Maloney, Vinay K. Khanna, Renu Wadhwa, Debomoy K. Lahiri, Mahendra K. Thakur**

**Supplementary Tables 1-6**

**Crude gels from Fig. 4**

**Crude gels from Fig. 5**

Supplementary Table 1. Percent changes in KLK8 qRT-PCR and WB from saline or scopolamine-treated mice.

| Treatment | KLK8 <i>in situ</i> RNA |        |                |        | KLK8 qRT-PCR   |        |                |        | KLK8 WB        |        |                |         | MAP2c WB       |        |                |        |
|-----------|-------------------------|--------|----------------|--------|----------------|--------|----------------|--------|----------------|--------|----------------|---------|----------------|--------|----------------|--------|
|           | Change from SA          |        | Change from SC |        | Change from SA |        | Change from SC |        | Change from SA |        | Change from SC |         | Change from SA |        | Change from SC |        |
|           | Cortex                  | Hippoc | Cortex         | Hippoc | Cortex         | Hippoc | Cortex         | Hippoc | Cortex         | Hippoc | Cortex         | Hippoc  | Cortex         | Hippoc | Cortex         | Hippoc |
| SA        | +0%                     | +0%    | +24%           | §+285% | +0%            | +0%    | §+38%          | §+251% | +0%            | +0%    | §+94%          | §+300%  | +0%            | +0%    | *+60%          | *+188% |
| SC        | -19%                    | *-74%  | +0%            | +0%    | *-27%          | *-71%  | +0%            | +0%    | *-48%          | *-75%  | +0%            | +0%     | *-37%          | *-65%  | +0%            | +0%    |
| SC → i-E  | +5%                     | +8%    | +30%           | §+317% | *+35%          | -7%    | §+86%          | §+228% | +33%           | -32%   | §+159%         | §+174%  | *+21%          | *-24%  | *+93%          | *+118% |
| i-E       | *+57%                   | *+132% | §+95%          | §+794% | *+120%         | *+99%  | §+204%         | §+597% | *+78%          | *+200% | §+245%         | §+1100% | *+65%          | *+44%  | *+164%         | *+314% |
| i-E → SC  | *+30%                   | *+40%  | §+61%          | §+441% | *+42%          | *+31%  | §+96%          | §+360% | +39%           | *+134% | §+170%         | §+837%  | *+15%          | +11%   | *+83%          | *+220% |

\*Difference significant from SA at  $p \leq 0.05$ .

§Difference significant from SC at  $p \leq 0.05$ .

Supplementary Table 2 ANODE of mouse brain treatments vs. regions

| Term                      | KLK8 in situ RNA |        | KLK8 qRT-PCR  |        | KLK8 WB       |        | MAP2c WB      |        |
|---------------------------|------------------|--------|---------------|--------|---------------|--------|---------------|--------|
|                           | $\chi^2$ (df)    | p      | $\chi^2$ (df) | p      | $\chi^2$ (df) | p      | $\chi^2$ (df) | p      |
| Treatment                 | 1045.2 (4)       | <0.001 | 571.5 (4)     | <0.001 | 651.2 (4)     | <0.001 | 633.5 (4)     | <0.001 |
| Region                    | 822.8 (1)        | <0.001 | 0.1 (1)       | 0.715  | 299.2 (1)     | <0.001 | 33.4 (1)      | <0.001 |
| Treatment $\times$ Region | 1004.8 (4)       | <0.001 | 162.0 (4)     | <0.001 | 554.6 (4)     | <0.001 | 245.6 (4)     | <0.001 |

Supplementary Table 3. Percent changes in KLK8 qRT-PCR and WB from saline or scopolamine-treated mice vs M1 receptor agonist or antagonist treatment.

| Treatment         | KLK8 qRT-PCR   |        |                |         | KLK8 Western   |        |                |         | MAP2c Western  |        |                |        |
|-------------------|----------------|--------|----------------|---------|----------------|--------|----------------|---------|----------------|--------|----------------|--------|
|                   | Change from SA |        | Change from SC |         | Change from SA |        | Change from SC |         | Change from SA |        | Change from SC |        |
|                   | Cortex         | Hippoc | Cortex         | Hippoc  | Cortex         | Hippoc | Cortex         | Hippoc  | Cortex         | Hippoc | Cortex         | Hippoc |
| SA                | +0%            | +0%    | §+172%         | §+775%  | +0%            | +0%    | §+315%         | §+877%  | +0%            | +0%    | §+221%         | §+195% |
| M1 ant            | *-61%          | *-74%  | +6%            | §+127%  | *-70%          | *-70%  | §+26%          | §+196%  | -67%           | *-72%  | +5%            | -18%   |
| M1 ag             | *+157%         | *+146% | §+601%         | §+2055% | *+152%         | *+148% | §+946%         | §+2324% | *+160%         | *+115% | §+734%         | §+532% |
| SC                | *-63%          | *-89%  | +0%            | +0%     | *-76%          | *-90%  | +0%            | +0%     | -69%           | *-66%  | +0%            | +0%    |
| M1 ag → SC        | *+121%         | *+92%  | §+501%         | §+1582% | *+113%         | *+94%  | §+786%         | §+1796% | *+120%         | +23%   | §+606%         | §+263% |
| i-E → SC          | *+87%          | *+99%  | §+409%         | §+1644% | *+89%          | *+101% | §+686%         | §+1862% | *+86%          | *+51%  | §+498%         | §+344% |
| M1 ant → i-E → SC | +0%            | *-69%  | §+173%         | §+174%  | +7%            | *-64%  | §+343%         | §+247%  | +3%            | *-73%  | §+230%         | -20%   |
| i-E               | *+223%         | *+171% | §+780%         | §+2272% | *+220%         | *+171% | §+1230%        | §+2547% | *+227%         | *+163% | §+950%         | §+674% |
| M1 ant → SC       | -9%            | *-74%  | §+148%         | §+124%  | -13%           | *-73%  | §+260%         | §+165%  | -17%           | *-84%  | §+166%         | -53%   |

\*Difference significant from SA at  $p \leq 0.05$ .

§Difference significant from SC at  $p \leq 0.05$ .

*Withania* extract operates through M1 receptor

Supplementary Table 4 ANOVA of mouse brain treatments, including M1 agonist and antagonist, vs. brain regions

| Term                      | KLK8 qRT-PCR  |        | KLK8 WB       |        | MAP2c WB      |        |
|---------------------------|---------------|--------|---------------|--------|---------------|--------|
|                           | $\chi^2$ (df) | p      | $\chi^2$ (df) | p      | $\chi^2$ (df) | p      |
| Treatment                 | 1627 (8)      | <0.001 | 1845 (8)      | <0.001 | 267 (8)       | <0.001 |
| Region                    | 50 (1)        | <0.001 | 55 (1)        | <0.001 | 169 (1)       | <0.001 |
| Treatment $\times$ Region | 410 (8)       | <0.001 | 445 (8)       | <0.001 | 288 (8)       | <0.001 |

*Withania* extract operates through M1 receptor

Supplementary Table 5. Gavage and Injection Contents for data in Fig. 4

| <b>Treatment</b>                              | <b>Control</b>            | <b>Scop.</b>                       | <b>Scop. → i-Extract</b>           | <b>i-Extract</b>          | <b>i-Extract → Scop.</b>             |
|-----------------------------------------------|---------------------------|------------------------------------|------------------------------------|---------------------------|--------------------------------------|
| <b>Gavage</b>                                 | 0.5%<br>DMSO              | 0.5% DMSO                          | i-Extract in 0.5%<br>DMSO          | i-Extract in<br>0.5% DMSO | i-Extract in 0.5% DMSO               |
| <b>Injection</b>                              | 0.9% saline               | Scop. In 0.9% Saline               | Scop. in 0.9% saline               | 0.9% saline               | Scop. in 0.9% saline                 |
| <b>Order of drugs and<br/>separation time</b> | 0.9% saline<br><b>1h↓</b> | Scop in 0.9% saline<br><b>1h ↓</b> | Scop in 0.9% saline<br><b>1h ↓</b> | 0.9% saline<br><b>1h↓</b> | i-Extract in 0.5% DMSO<br><b>1h↓</b> |
|                                               | 0.5%DMSO                  | 0.5%DMSO                           | i-Extract in 0.5%<br>DMSO          | i-Extract in<br>0.5% DMSO | Scop in 0.9% saline                  |

Table lists contents of gavage and injection treatments given to animal groups as portrayed in Fig. 2. Note that multiple substances were not given simultaneously but were separated by hours as specifically described in main text.

*Withania* extract operates through M1 receptor

Supplementary Table 6. Gavage and Injection Contents for data in Fig. 5

| Treatment                                 | Control                                 | Antagonist                                            | Agonist                                            | Scop.                                            | Agonist → Scop.                                                                           | i-E → Scop.                                                   | Antagonist → i-Extract → Scop.                                                         | i-Extract                                            | Antagonist → i-Extract                               |
|-------------------------------------------|-----------------------------------------|-------------------------------------------------------|----------------------------------------------------|--------------------------------------------------|-------------------------------------------------------------------------------------------|---------------------------------------------------------------|----------------------------------------------------------------------------------------|------------------------------------------------------|------------------------------------------------------|
| <b>Gavage</b>                             | 0.5% DMSO                               | 0.5% DMSO                                             | 0.5% DMSO                                          | 0.5% DMSO                                        | 0.5% DMSO                                                                                 | i-Extract in 0.5% DMSO                                        | i-Extract in 0.5% DMSO                                                                 | i-Extract in 0.5% DMSO                               | i-Extract in 0.5% DMSO                               |
| <b>Injection</b>                          | saline                                  | Antagonist in saline                                  | Agonist in saline                                  | Scop. in Saline                                  | Agonist + Scop. In saline                                                                 | Scop. in saline                                               | Antagonist + Scop. in saline                                                           | Saline                                               | Antagonist in Saline                                 |
| <b>Order of drugs and separation time</b> | 0.9% saline<br><b>1h</b> ↓<br>0.5% DMSO | Antagonist in 0.9% saline<br><b>1h</b> ↓<br>0.5% DMSO | Agonist in 0.9% saline<br><b>1h</b> ↓<br>0.5% DMSO | Scop. in 0.9% saline<br><b>1h</b> ↓<br>0.5% DMSO | Agonist in 0.9% saline<br><b>2h</b> ↓<br>Scop. in 0.9% saline<br><b>1h</b> ↓<br>0.5% DMSO | i-Extract in 0.5% DMSO<br><b>1h</b> ↓<br>Scop. in 0.9% saline | Ant in saline<br><b>1h</b> ↓<br>i-Extract in 6% DMSO<br><b>1h</b> ↓<br>Scop. in saline | 0.9% saline<br><b>1h</b> ↓<br>i-Extract in 0.5% DMSO | Ant in saline<br><b>2h</b> ↓<br>i-Extract in 6% DMSO |

Table lists contents of gavage and injection treatments given to animal groups as portrayed in Fig. 3. Note that multiple substances were not given simultaneously but were separated by hours as specifically described in main text.

**Fig. 4B gels**

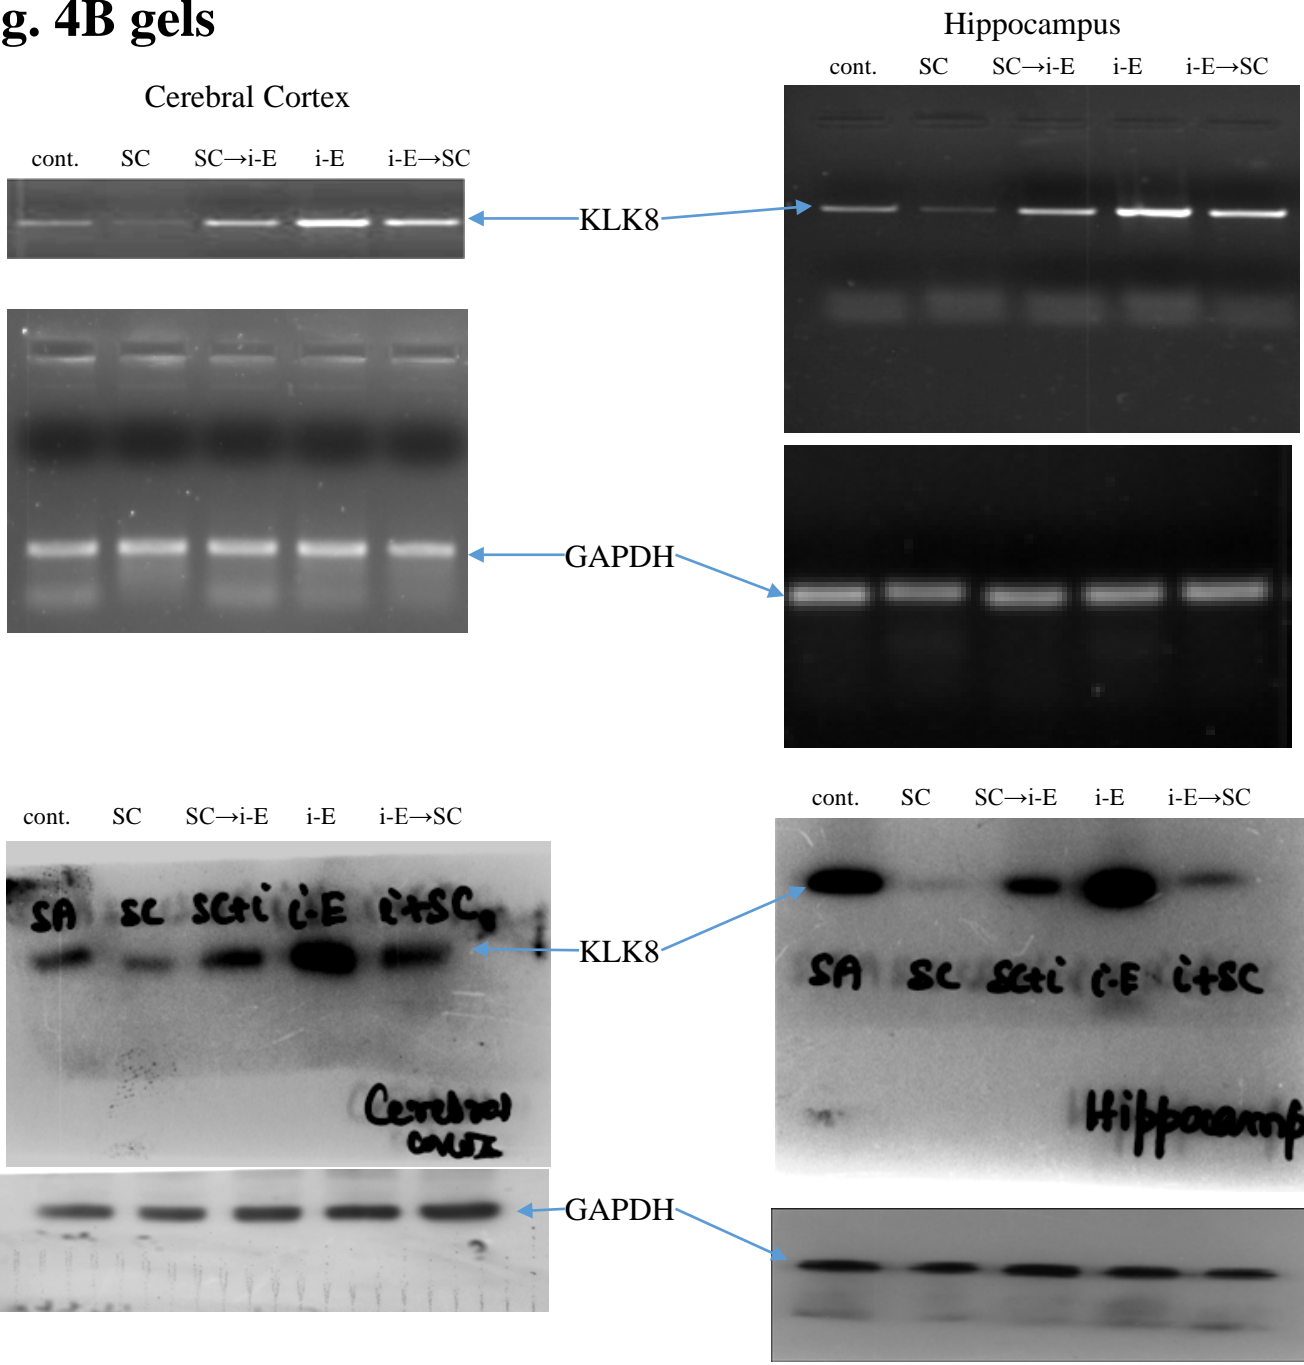

**Fig. 4C gels**

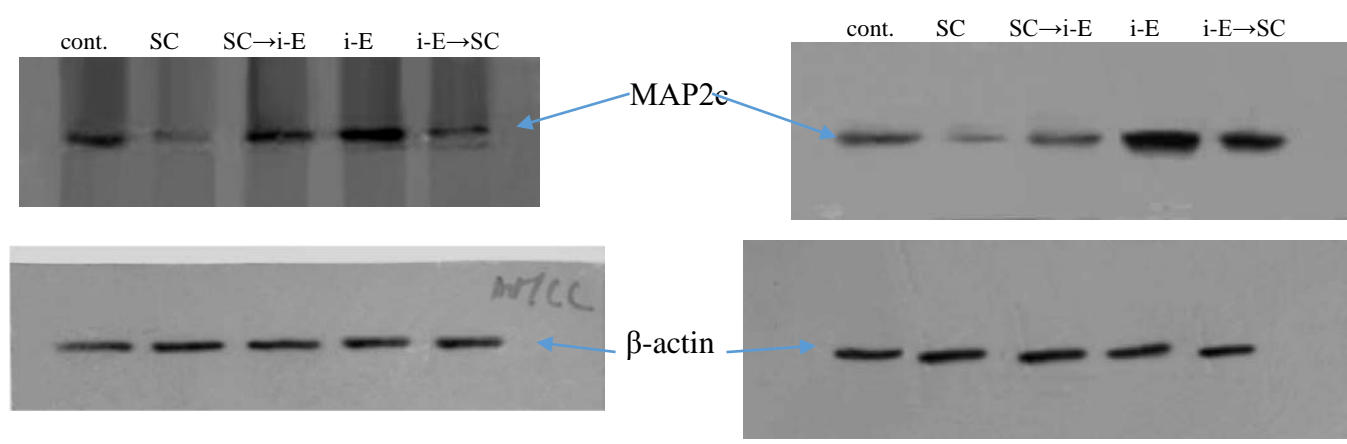



**Fig. 5A gels**

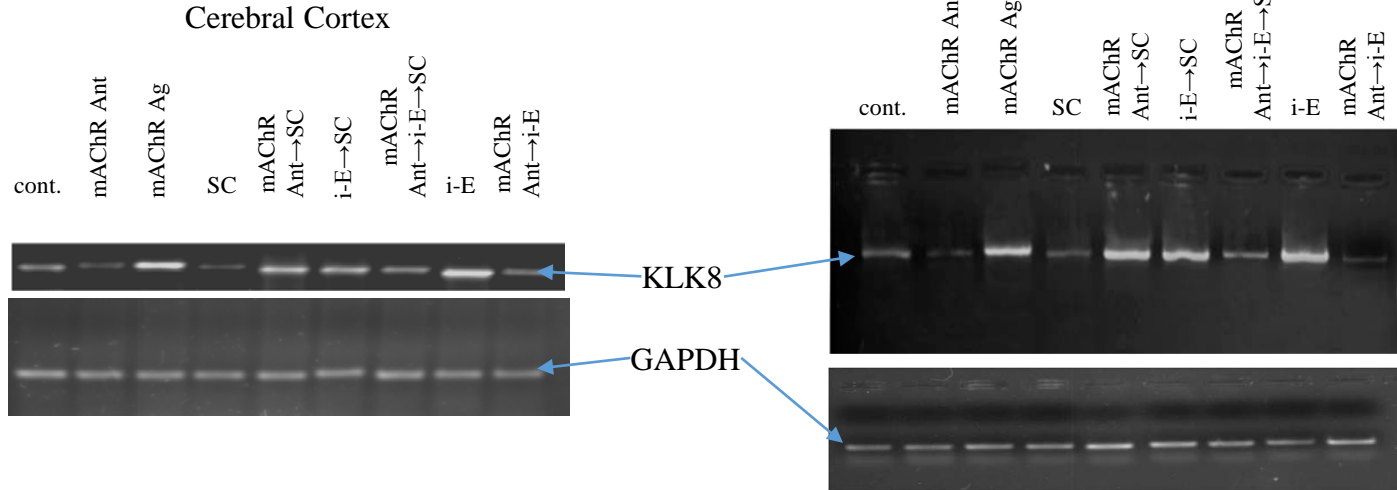

**Fig. 5B gels**

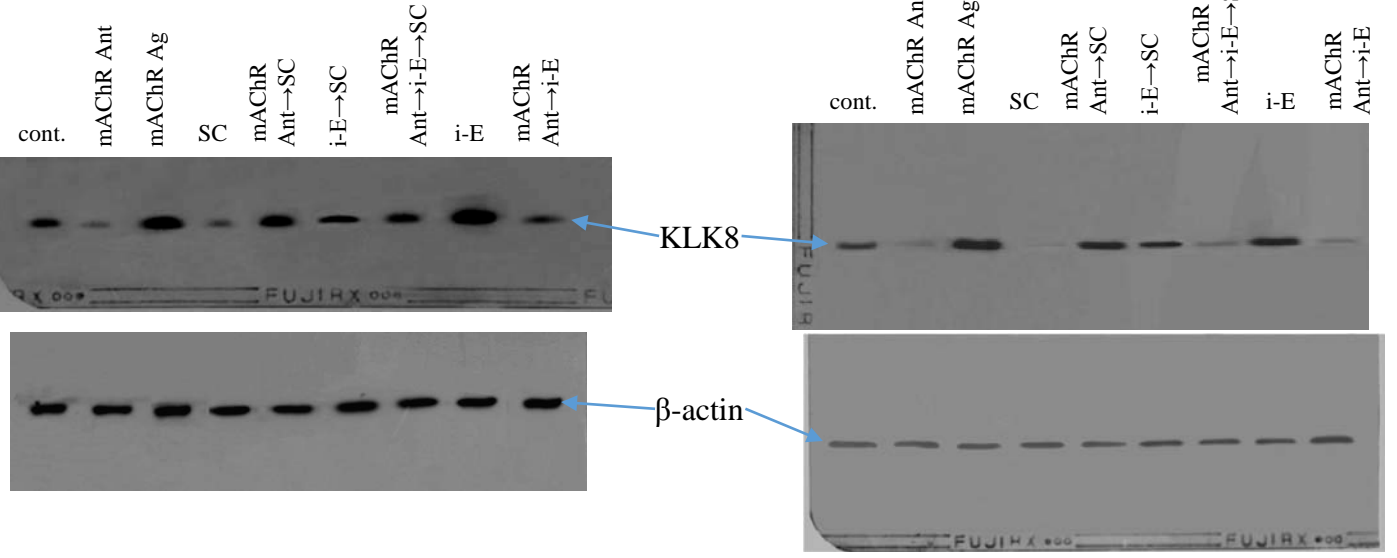

**Fig. 5C gels**

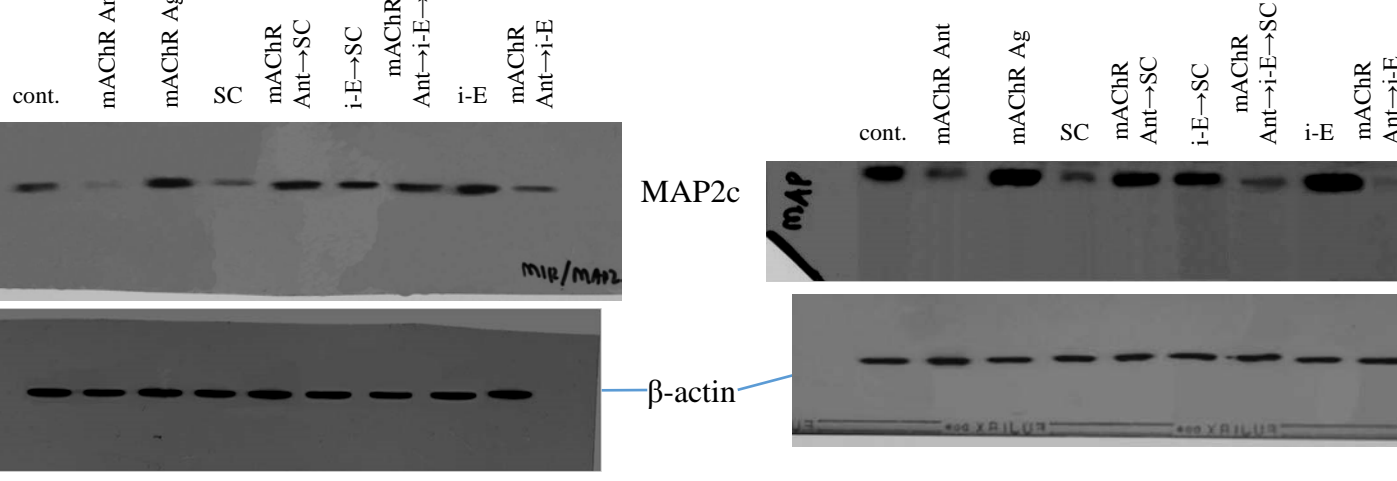

Supplement: 41598_2019_48238_MOESM1_ESM.pdf [file 41598_2019_48238_MOESM1_ESM.pdf]
